# Supplementary material for: Optical follow-up of the neutron star–black hole mergers S200105ae and S200115j
Source: Springer Nature journal article supplement (doi:10.1038/s41550-020-1183-3), 2020-09-14
Supplement: 41550_2020_1183_MOESM1_ESM.pdf [file 41550_2020_1183_MOESM1_ESM.pdf]

---

**Supplementary information**

---

**Optical follow-up of the neutron star–black hole mergers S200105ae and S200115j**

---

In the format provided by the authors and unedited

# Supplemental Information for “Optical follow-up of the neutron star-black hole mergers S200105ae and S200115j”

Shreya Anand<sup>1\*</sup>, Michael W. Coughlin<sup>1,2\*</sup>, Mansi M. Kasliwal<sup>1</sup>, Mattia Bulla<sup>3</sup>, Tomás Ahumada<sup>4</sup>, Ana Sagués Carracedo<sup>5</sup>, Mouza Almualla<sup>6</sup>, Igor Andreoni<sup>1</sup>, Robert Stein<sup>7,8</sup>, Francois Foucart<sup>9</sup>, Leo P. Singer<sup>10,11</sup>, Jesper Sollerman<sup>12</sup>, Eric C. Bellm<sup>13</sup>, Bryce Bolin<sup>1</sup>, M. D. Caballero-García<sup>14</sup>, Alberto J. Castro-Tirado<sup>15,16</sup>, S. Bradley Cenko<sup>10,11</sup>, Kishalay De<sup>1</sup>, Richard G. Dekany<sup>17</sup>, Dmitry A. Duev<sup>1</sup>, Michael Feeney<sup>17</sup>, Christoffer Fremling<sup>1</sup>, Daniel A. Goldstein<sup>1</sup>, V. Zach Golkhou<sup>13,18</sup>, Matthew J. Graham<sup>1</sup>, Nidhal Guessoum<sup>6</sup>, Matthew J. Hankins<sup>1</sup>, Youdong Hu<sup>15,19</sup>, Albert K. H. Kong<sup>20</sup>, Erik C. Kool<sup>12</sup>, S. R. Kulkarni<sup>1</sup>, Harsh Kumar<sup>21</sup>, Russ R. Laher<sup>22</sup>, Frank J. Masci<sup>22</sup>, Przemek Mróz<sup>1</sup>, Samaya Nissanke<sup>23</sup> Michael Porter<sup>17</sup>, Simeon Reusch<sup>7,8</sup>, Reed Riddle<sup>17</sup>, Philippe Rosnet<sup>24</sup>, Ben Rusholme<sup>22</sup>, Eugene Serabyn<sup>25</sup>, R. Sánchez-Ramírez<sup>26</sup>, Mickael Rigault<sup>24</sup>, David L. Shupe<sup>22</sup>, Roger Smith<sup>17</sup>, Maayane T. Soumagnac<sup>27,28</sup>, Richard Walters<sup>17</sup> and Azamat F. Valeev<sup>29</sup>

<sup>1</sup>*Division of Physics, Mathematics, and Astronomy, California Institute of Technology, Pasadena, CA 91125, USA*

<sup>2</sup>*School of Physics and Astronomy, University of Minnesota, Minneapolis, Minnesota 55455, USA*

<sup>3</sup>*Nordita, KTH Royal Institute of Technology and Stockholm University, Roslagstullsbacken 23, SE-106 91 Stockholm, Sweden*

<sup>4</sup>*Department of Astronomy, University of Maryland, College Park, MD 20742, USA*

<sup>5</sup>*The Oskar Klein Centre, Department of Physics, Stockholm University, AlbaNova, SE-106 91 Stockholm, Sweden*

<sup>6</sup>*American University of Sharjah, Physics Department, PO Box 26666, Sharjah, UAE*

<sup>7</sup>*Deutsches Elektronen Synchrotron DESY, Platanenallee 6, 15738 Zeuthen, Germany*

<sup>8</sup>*Institut für Physik, Humboldt-Universität zu Berlin, D-12489 Berlin, Germany*

<sup>9</sup>*Department of Physics, University of New Hampshire, 9 Library Way, Durham NH 03824, USA*

<sup>10</sup>*Astrophysics Science Division, NASA Goddard Space Flight Center, MC 661, Greenbelt, MD 20771, USA*

<sup>11</sup>*Joint Space-Science Institute, University of Maryland, College Park, MD 20742, USA*

<sup>12</sup>*The Oskar Klein Centre, Department of Astronomy, Stockholm University, AlbaNova, SE-106 91 Stockholm, Sweden*

---

\* These two authors contributed equally to this work.

31 <sup>13</sup>*DIRAC Institute, Department of Astronomy, University of Washington, 3910 15th Avenue NE,*  
32 *Seattle, WA 98195, USA*

33 <sup>14</sup>*Astronomical Institute of the Academy of Sciences, Bocní II 1401, CZ-14100 Praha 4, Czech*  
34 *Republic.*

35 <sup>15</sup>*Instituto de Astrofísica de Andalucía (IAA-CSIC), Glorieta de la Astronomía s/n, E-18008,*  
36 *Granada, Spain*

37 <sup>16</sup>*Departamento de Ingeniería de Sistemas y Automática, Escuela de Ingenieros Industriales,*  
38 *Universidad de Málaga, Unidad Asociada al CSIC, C. Dr. Ortiz Ramos sn, 29071 Málaga, Spain*

39 <sup>17</sup>*Caltech Optical Observatories, California Institute of Technology, Pasadena, CA 91125, USA*

40 <sup>18</sup>*The eScience Institute, University of Washington, Seattle, WA 98195, USA*

41 <sup>19</sup>*Universidad de Granada, Facultad de Ciencias Campus Fuentenueva S/N CP 18071 Granada,*  
42 *Spain*

43 <sup>20</sup>*Institute of Astronomy, National Tsing Hua University, Hsinchu 30013, Taiwan*

44 <sup>21</sup>*Indian Institute of Technology Bombay, Powai, Mumbai 400076, India*

45 <sup>22</sup>*IPAC, California Institute of Technology, 1200 E. California Blvd, Pasadena, CA 91125, USA*

46 <sup>23</sup>*Center of Excellence in Gravitation and Astroparticle Physics, University of Amsterdam,*  
47 *Netherlands*

48 <sup>24</sup>*Université Clermont Auvergne, CNRS/IN2P3, Laboratoire de Physique de Clermont, F-63000*  
49 *Clermont-Ferrand, France*

50 <sup>25</sup>*Jet Propulsion Laboratory, California Institute of Technology, Pasadena, CA 91109, USA*

51 <sup>26</sup>*INAF - Istituto di Astrofisica e Planetologia Spaziali, Via Fosso del Cavaliere 100, 00133 Roma,*  
52 *Italy.*

53 <sup>27</sup>*Lawrence Berkeley National Laboratory, 1 Cyclotron Road, Berkeley, CA 94720, USA*

54 <sup>28</sup>*Department of Particle Physics and Astrophysics, Weizmann Institute of Science, Rehovot*  
55 *76100, Israel*

56 <sup>29</sup>*Special Astrophysical Observatory, Russian Academy of Sciences, Nizhnii Arkhyz, 369167*  
57 *Russia*

## 58 **1 Observational details**

59 **Photometric Observations** The ZTF observations used to discover potential candidates were  
60 primarily obtained with ToO program time, however the public survey <sup>1</sup> provided us with data as

61 well. The nominal exposure time for the ZTF public survey is 30s while for the ToO program varies  
62 from 120-300 s depending on the available time and sky area requiring coverage. Our first source  
63 of photometry comes from the ZTF alert production pipeline <sup>2</sup>, however for the purposes of this  
64 paper we have performed forced photometry using the package `ForcePhot`<sup>3</sup> on the candidates  
65 and reported these values.

66 For S200105ae, we split the schedule into two blocks of right ascension due to the significantly  
67 displaced lobes in the skymap, with observations lasting three hours per block. We additionally  
68 utilized the “filter balancing” feature <sup>4</sup>, which optimizes for the number of fields that have observations  
69 scheduled in all requested filters, and employed the greedy-slew algorithm <sup>5</sup> for conducting our  
70 search. The ability to split the skymap in right ascension and the use of filter balancing was novel  
71 for these observations, and served to help address the previous difficulty with multi-lobed skymaps  
72 to make it possible to observe all filters requested for the scheduled fields. Previously, maps of  
73 this type created conflicts between the rising/setting times of the lobes, as well as the separation in  
74 time between each of the epochs. This problem impacts the transient filtering process as well, for  
75 example, resulting in a number of transients failing to satisfy the criteria of 15 minutes between  
76 consecutive detections to reject asteroids. With the implementation of these features, both *g*- and  
77 *r*-band epochs were successfully scheduled for almost all fields.

78 For photometric follow-up we used the Gemini Multi-Object Spectrograph (GMOS-N)<sup>6</sup> on  
79 the Gemini-North 8-meter telescope on Mauna Kea, the Spectral Energy Distribution Machine  
80 (SEDM) on the Palomar 60-inch telescope <sup>7</sup>, the Wide-field Infrared Camera (WIRC)<sup>8</sup> on the  
81 Palomar 200-inch telescope, as well as telescopes that are part of the Las Cumbres Observatory  
82 (LCO) network and the Kitt Peak EMCCD Demonstrator (KPED)<sup>9</sup>.

83 The LCO observations were scheduled using the LCO Observation Portal (<https://observe.lco.global/>),  
84 an online platform designed to coordinate observations. Our imaging plans  
85 changed case by case, however our standard requests involved 3 sets of 300s in *g*- and *r*- band  
86 with the 1-m telescopes. For fainter sources we requested 300s of *g*- and *r*- band with the 2-m  
87 telescopes. The reduced images available from the Observation Portal were later stacked and  
88 sources were extracted with the `SourceExtractor` package<sup>10</sup>. We calibrated magnitudes against  
89 Pan-STARRS1<sup>11</sup> sources in the field. For transients separated  $< 8''$  from their hosts, we aligned  
90 a cutout of the transient with a Pan-STARRS1 template using `SCAMP`<sup>12</sup> and performed image

91 subtraction with the High Order Transform of Psf ANd Template Subtraction (HOTPANTS) code  
92 <sup>13</sup>, an enhanced version of the method derived by Ref. <sup>14</sup>. Photometry for these candidates comes  
93 from an analogous analysis on the residual images. Furthermore, images obtained with the Liverpool  
94 telescope (LT)<sup>15</sup> were reduced, calibrated and analysed in a similar fashion.

95 For KPED data, our standard procedure is to stack an hour of *r*-band data and reduce the  
96 stacked images following to standard bias and flat field calibrations. The photometry is obtained  
97 following the same methods as for the LCO data.

98 The photometric data obtained with GMOS-N was split in four 200 s *g*-band images later  
99 combined and reduced with DRAGONS (<https://dragons.readthedocs.io/en/stable/>),  
100 a Python-base data reduction platform provided by the Gemini Observatory. The data were later  
101 calibrated using the methods described for LCO.

102 Additionally, we scheduled photometric observations with the SEDM automatically through  
103 the GROWTH marshal. We acquired *g*-, *r*-, and *i*- band imaging with the Rainbow Camera  
104 on SEDM in 300s exposures. SEDM employs a python-based pipeline that performs standard  
105 photometric reduction techniques and uses an adaptation of `FPipe` (Fremling Automated Pipeline;  
106 described in detail in Ref. <sup>16</sup>) for difference imaging. Data are automatically uploaded to the  
107 GROWTH marshal after having been reduced and calibrated.

108 The near-infrared data obtained with WIRC were reduced using a custom data reduction  
109 pipeline described in Ref. <sup>17</sup>, and involved dark subtraction followed by flat-fielding using sky-flats.  
110 The images were then stacked using Swarp <sup>18</sup> and photometric calibration was performed against  
111 the 2MASS point source catalog <sup>19</sup>. Reported magnitudes were derived by performing aperture  
112 photometry at the location of the transient using an aperture matched to the seeing at the time of  
113 observation, including an aperture correction to infinite radius.

114 The photometry presented in the light-curves on this paper was corrected for galactic extinction  
115 using dust maps from Ref. <sup>20</sup>.

116 **Spectroscopic Observations** For the candidate dataset described in Sec. 2, we obtained spectroscopic  
117 data using the Gran Telescopio Canarias (GTC) and Palomar observatory. We obtained optical

118 spectra of one set of candidates with the 10.4-meter GTC telescope (equipped with OSIRIS).  
119 Observations made use of the R1000B and R500R grisms, using typically a slit of width 1.2".  
120 Data reduction was performed using standard routines from the Image Reduction and Analysis  
121 Facility (IRAF).

122 For the second set of candidates, we acquired most of our spectra with the Integral Field  
123 Unit (IFU) on SEDM, a robotic spectrograph on the Palomar 60-inch telescope <sup>7</sup>. We scheduled  
124 spectroscopic observations for our brighter ( $m_{AB} < 19$ ) and higher priority targets using a tool on  
125 the GROWTH Marshal that directly adds the target to the SEDM queue. For each science target,  
126 the SEDM robot obtains an acquisition image, solves the astrometry and then sets the target at  
127 the center of the integral field unit field of view. At the end of exposure, the automated pysedm  
128 pipeline is run <sup>21</sup>. It first extracts the IFU spaxel tracers into a  $x, y, \lambda$  cube accounting for instrument  
129 flexures; the target spectrum is then extracted from the cube using a 3D PSF model which accounts  
130 for atmospheric differential refractions. The spectrum is finally flux calibrated using the most  
131 recent standard star observation of the night, with the telluric absorption lines scaled for the target's  
132 airmass. See Ref. <sup>21</sup> for more details on the reduction pipeline. The final extracted spectra are then  
133 uploaded to the marshal; we use the SNID software <sup>22</sup> to classify our transients.

134 Using the Double Spectrograph (DBSP) on the Palomar 200-inch telescope we obtained one  
135 transient and one host galaxy spectrum during our classical observing run on 2020-01-18 UT. For  
136 the setup configuration, we use 1.0" and 1.5" slitmasks, a D55 dichroic, a B grating of 600/4000  
137 and R grating of 316/7500. Data were reduced using a custom PyRAF DBSP reduction pipeline  
138 (<https://github.com/ebellm/pyraf-dbsp>) <sup>23</sup>.

## 139 2 Candidates

140 **S200105ae candidates** In this subsection, we provide brief descriptions of candidates identified  
141 within the skymap of S200105ae. Due to the poor seeing conditions and moon brightness, there  
142 were no candidates that passed all of the criteria after the second night of observations. After the  
143 third night of observations of S200105ae, we identified 5 candidates within the skymap <sup>24</sup>, shown  
144 in Supplementary Information Table 1. In addition, we later identified and reported other candidate  
145 counterparts <sup>25</sup>. A late-time query ( $> 1$  month after the mergers) yielded two further candidates of  
146 interest, ZTF20aafsnux and ZTF20aaegqfp, that were not already reported via Gamma-ray burst

147 Coordinates Network (GCN).

148 All the transients are displayed in Supplementary Information Table 2; here we briefly  
149 describe each set, and show examples of light curves and cutouts for the most well-sampled, slowly  
150 photometrically evolving ones in Supplementary Information Figure 1. For the candidates with  
151 spectroscopic redshifts, we compute their distance assuming Planck15 cosmological parameters  
152 and use them to estimate the source absolute magnitudes, which we include in the candidate  
153 descriptions. When vetting, we prioritized candidates whose distance fell within the  $1\sigma$  LIGO  
154 distance uncertainty for each event; however we did not reject any candidates on the basis of  
155 redshift.

156 The redshifts presented in this section come either from the spectra of the transient,  $z(s)$ ,  
157 or from the Photometric Redshifts for the Legacy Surveys (PRLS) catalog (Zhou et al. in prep.),  
158 which is based on Data Release 8 of DESI Legacy Imaging Surveys<sup>26</sup>,  $z(p)$ .

## 159 Spectroscopic Classification

160 For this set of spectra, we quote the photometric phase at which the spectrum was taken when  
161 the photometry is well-sampled. In all other cases, we derive the spectroscopic phase of the  
162 transient using SNID<sup>22</sup> unless otherwise specified. Most of the spectroscopic classifications were  
163 determined using SNID.

164 *ZTF20aaertpj* - The first  $r$ - and  $g$ -band detections of this transient 3 days after the merger  
165 showed a red color  $g - r = 0.4$  mag; it rapidly brightened 1 mag to reach  $g = 18.9$  after 7 days. The  
166 Gran Telescopio Canarias (GTC) classified it as a Type Ib SN ( $z(s) = 0.026$ ) on January 10th<sup>27</sup> a  
167 few days before the ZTF lightcurve reached maximum light, implying an absolute magnitude of  
168  $-15.9$  mag. This supernova is closer than the  $-1\sigma$  LIGO distance.

169 *ZTF20aaervoa* - This object was found 3 days after the merger at 20.74 mag in  $g$  band with a  
170 red color ( $g - r = 0.66$  mag). This field was last observed 1.6 days before the merger. It showed a  
171 flat evolution over the first few days. Spectroscopic follow-up with GTC on January 10th classified  
172 it as a SN Type IIP ( $z(s) = 0.046$ ),  $\sim 3$  days after maximum<sup>28</sup> using SNID templates. This implied

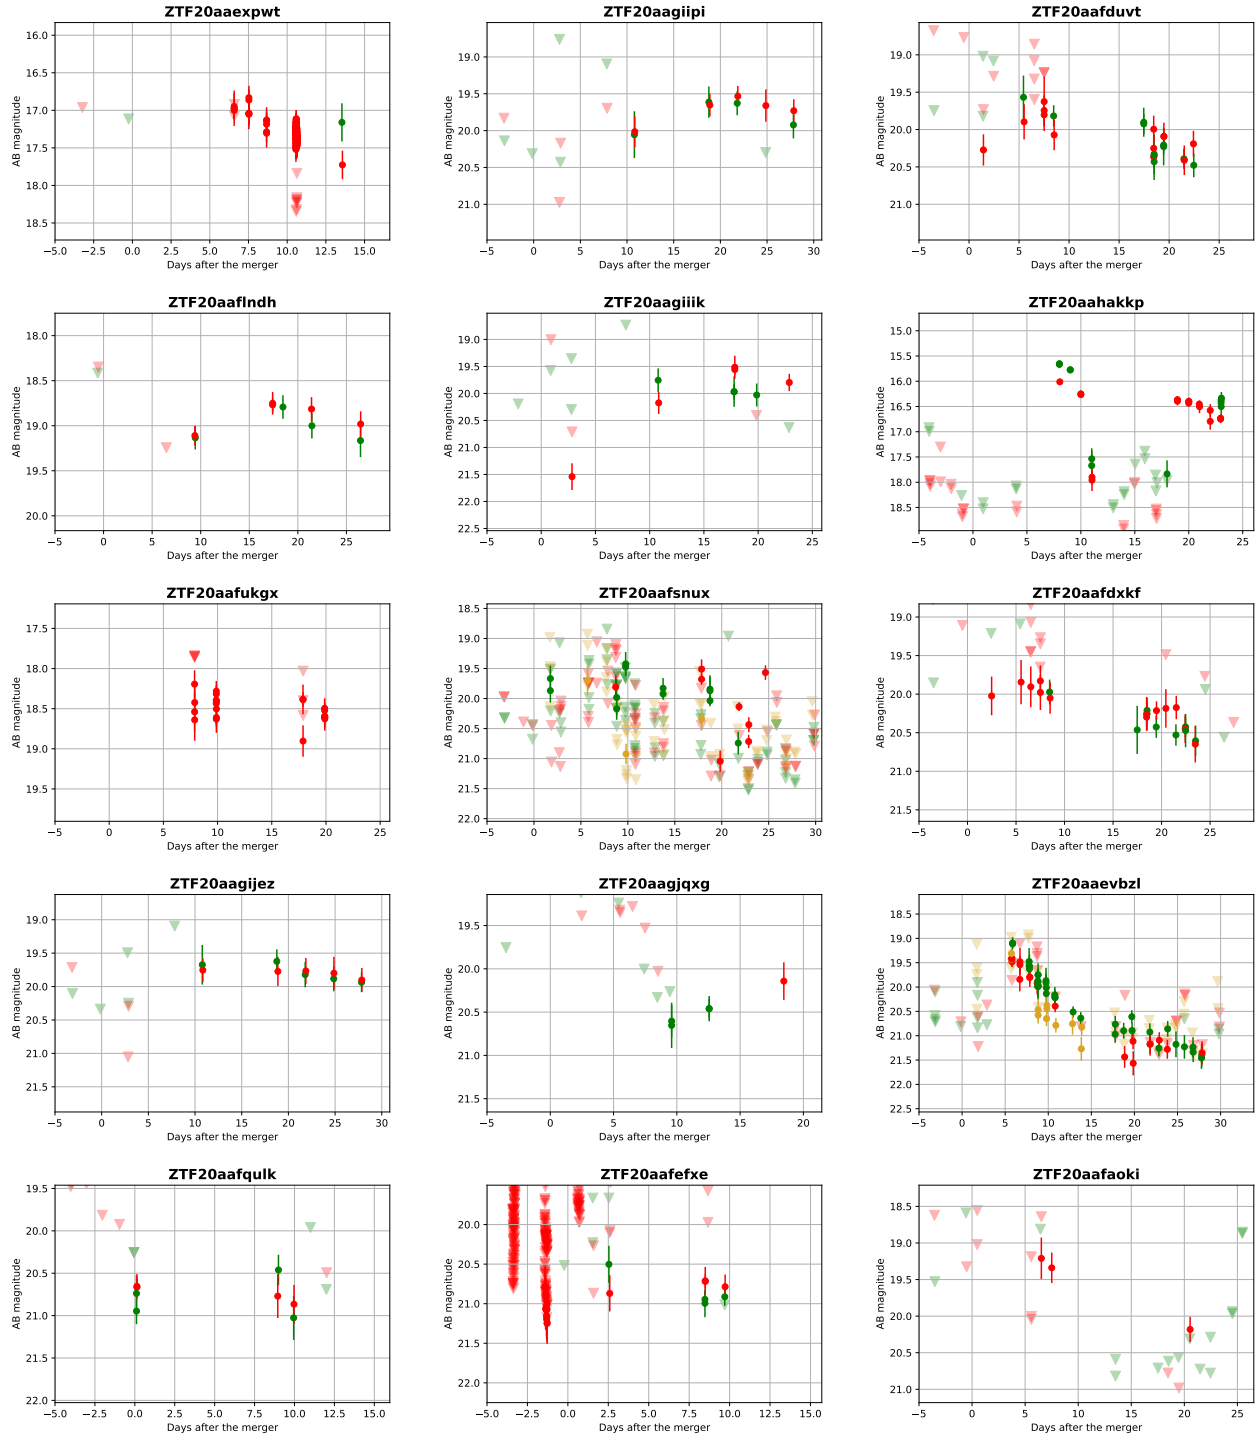

Supplementary Information Figure 1: **Lightcurves for all objects ruled out photometrically.** In each panel, filled circles represent ZTF forced photometry and the photometry from the ZTF alert production pipeline, with error bars corresponding to 1- $\sigma$  uncertainties. Filled triangles display 5- $\sigma$  upper limits for non-detections. The *r*-, *g*-, and *i*-band data is presented in red, green and yellow respectively.



173 an absolute magnitude of  $-16.4$  mag in  $r$  band. Its redshift is marginally consistent with the LIGO  
174 distance uncertainty, though it fell outside the 95% confidence level of the LALInference skymap.

175 *ZTF20aaervyn* - Its first detection was in the  $g$  band ( $g = 20.62$  mag), 3 days after the merger,  
176 which first showed a red color ( $g - r = 0.3$  mag). This field was last visited 3 hours before the  
177 LVC alert. It was classified by GTC on January 11th as a Type Ia SN, with  $z(s) = 0.1146$ <sup>28</sup>, much  
178 farther than  $+1\sigma$  LIGO distance. The spectroscopic phase corresponds to  $\gtrsim 1$  week before the  
179 lightcurve reached maximum light.

180 *ZTF20aaerxsd* - Similarly, this region was visited 3 hours before the LVC alert and this  
181 candidate was first detected 3 days after the merger at  $g = 20.27$  mag and showed a red color of  
182  $g - r = 0.37$  mag. The next couple of detections showed a quickly evolving transient, brightening  
183  $\sim 0.35$  mag/day. GTC spectroscopically classified it as a SN Type Ia ( $z(s) = 0.0533$ ) on January  
184 10th<sup>28</sup>; concurrent photometry with ZTF indicates that the spectrum was taken  $> 12$  days before  
185 maximum.

186 *ZTF20aaerqbx* - This transient was first detected in  $g$ -band at  $g = 19.46$  mag 3 days after the  
187 merger. It faded 0.5 mag over the first 8 days and was classified by GTC on January 11th as a Type  
188 IIP SN ( $z(s) = 0.098$ ) at 5 days before maximum, using SNID<sup>27</sup>. Its redshift places it outside of  
189 the LIGO volume.

190 *ZTF20aafanxk* - This candidate was detected at  $r = 18.52$  mag, 6 days after the merger with  
191 galactic latitude  $< 15^\circ$  and offset by  $7''$  from a possible host<sup>25</sup>; it faded 0.3 mag in the  $r$ -band the  
192 first 10 days and a spectrum taken with the P60 SEDM spectrograph revealed its classification to  
193 be a SN Ia at  $z(s) = 0.103$ , too far to be consistent with the LIGO distance.

194 *ZTF20aafujqk* - Offset by  $2.26''$  from the center of a large spiral galaxy host<sup>25</sup>, ZTF20aafujqk  
195 was detected in  $r$ -band during serendipitous observations 10 days after the merger, and later  
196 followed up with SEDM photometry in  $g$ - and  $i$ - bands, which showed a steadily declining lightcurve.  
197 SEDM spectroscopy showed that it was also a SN Ia at  $z(s) = 0.06$ , consistent with LIGO distance  
198 uncertainties.

199 *ZTF20aaevbzl* - This region was last observed 3 hours before the LVC alert. ZTF20aaevbzl

200 was detected six days after the merger <sup>25</sup>, this candidate was selected for its atypical rapid decline  
 201 in its lightcurve in  $r$ - and  $g$ -bands. This hostless transient faded 1.1 mag in 5 days in the  $g$ -band.  
 202 We obtained a spectrum of ZTF20aaevbz1 with P200+DBSP, whose  $H\alpha$  feature at  $z(s) = 0$  amidst  
 203 a blue, mostly featureless spectrum indicates that it is a galactic cataclysmic variable (See Figure 2  
 204 in Main Text). Further follow-up with SEDM and LCO showed that the transient was consistently  
 205 fading at 0.18 magnitudes per day in the  $g$ - band.

### 206 (Slow) Photometric Evolution

207 As mentioned above, we deem candidates to be slowly evolving by checking whether their rise  
 208 or decay rate is faster than our photometric cut of  $< |0.3|$  mag/day. We justify this cut based  
 209 on Supplementary Information Figure 2, a histogram of the evolution rates of KNe from NSBH  
 210 mergers, which shows that over a baseline of  $\gtrsim 1$  week, which is the case for our candidates, nearly  
 211 all KN model lightcurves evolve faster than this cut in both  $g$ - and  $r$ -bands. The decline rate is  
 212 determined using the photometric band with the longest available baseline. It is calculated by  
 213 getting the ratio between the  $\Delta m$  and the length of that baseline ( $\Delta t$ ), from the candidate's peak to  
 214 its last detection. This cut does exclude from our analysis a small part of the physically acceptable  
 215 parameter space of NSBH binaries, though it significantly reduced the number of false-positive  
 216 transients. It should thus be seen as a trade-off between parameter space coverage and the cost of  
 217 EM follow-up that result in a small and known bias in our search.

218 *ZTF20aafduvt* - The field where this transient lies was observed 12 hours before the LVC  
 219 alert, and it was detected six days after the merger in  $r$ - and  $g$ - bands <sup>25</sup>, offset from a possible host  
 220 at  $z(p) = 0.21 \pm 0.02$  by 51kpc, this candidate faded 0.1 mag in the  $g$ -band during the first 9 days  
 221 after the discovery. The photometric redshift places this transient at an absolute magnitude of  $M$   
 222 = -21.

223 *ZTF20aafndh* - With its last non-detection 12 hours before the GW alert, ZTF20aafndh was  
 224 first detected 10 days after the merger. This source is located  $0.8''$  from the center of an apparently  
 225 small galaxy <sup>25</sup> and evolved photometrically to resemble a Type Ia SN light curve; it faded in the  
 226  $r$ -band by 0.17 mag in 17 days. Furthermore, the photo- $z$  of the host galaxy is  $z(p) = 0.091 \pm$   
 227  $0.023$  which puts the transient at an absolute magnitude of  $M = -19.06$  mag, consistent with a Type

228 Ia SN.

229 *ZTF20aaexpwt* - This candidate was first detected one week post-merger, and was one of  
230 several hostless candidates identified in a low galactic latitude ( $b_{\text{gal}} < 15^\circ$ ) field <sup>25</sup>. The last  
231 non-detection was 5 hours before the LVC alert. Its evolution over the next seven days was  
232 0.12 mag/day in the  $r$ -band, marked by a declining lightcurve.

233 *ZTF20aafukgx* - Offset from a potential bright host by  $3.85''$ , at low galactic latitude <sup>25</sup>, this  
234 candidate was detected at  $r = 18.4$  ten days after the merger but remained flat within error-bars  
235 over the next ten days of observations.

236 *ZTF20aagijez* - First detected 11 days post-merger, this candidate, offset  $3.15''$  from the  
237 nucleus of a star-forming galaxy at  $z(s) = 0.061$  <sup>25</sup>, exhibited a flat lightcurve for more than 10  
238 days and it was still detectable after 40 days; it photometrically resembles a SN light curve. The  
239 spectroscopic host redshift implies an absolute magnitude of  $M = -17.6$  mag. The last visit to the  
240 field where this transient lies was 3.6 hours before the GW alert.

241 *ZTF20aagiik* - This field was last visited 2 days before the LVC alert. We identified *ZTF20aagiik*  
242 as a candidate of interest due to its rapid rise in  $r$ -band after being detected 11 days after the merger;  
243 it is offset by  $5.79''$  from a potential spiral galaxy host <sup>25</sup>. However, it only faded 0.4 mag in 12  
244 days. Additionally, at the redshift of the potential host galaxy ( $z(s) = 0.13$ , separated by  $5.25''$ ) the  
245 absolute magnitude ( $M = -19.24$  mag) is consistent with a Type Ia SN.

246 *ZTF20aafdxkf* - Detected just three days after the merger, this hostless candidate exhibited a  
247 rise in  $r$ -band over the first three days <sup>25</sup>, but its declining  $g$ -band photometry showed it to be too  
248 slow to be a KN. It only faded 0.5 mag in the  $g$ -band during the first 14 days. The last non-detection  
249 was 12 hours before the LVC alert.

250 *ZTF20aagiipi* - Offset by 27 kpc from a potential faint host at  $z(p) = 0.388 \pm 0.016$ , this  
251 candidate seemed to be rising when it was detected in the first 11 days after merger. Supplemented  
252 with SEDM photometry, its lightcurve closely resembles that of a typical Type Ia supernova, which  
253 at the redshift of the host would peak at  $M = -21.6$  mag. This field was last observed 3.6 hrs before  
254 the LVC alert.

255 *ZTF20aafsnux* - A hostless candidate, *ZTF20aafsnux* appeared to be declining gradually  
256 based on its first two *g*-band detections two and nine days after the merger. Close monitoring  
257 revealed that the source was fluctuating between  $g \sim 19.0\text{--}20.0$  mag over a period of 17 days. This  
258 region was last visited 3 hours before the GW alert.

259 *ZTF20aaertil* - This candidate was first detected three days after the merger; it was located  
260  $0.2''$  from the nucleus of a faint galaxy host and appeared to be rising in *g*-band<sup>25</sup>. Our spectrum  
261 of the host galaxy with DBSP on Jan 18th demonstrated that the galaxy, at  $z(s) = 0.093$ , was  
262 outside the one-sigma distance uncertainty for S200105ae; furthermore, in 40 days, it faded only  
263  $0.5$  mag in the *r*-band. The absolute magnitude at this host redshift is  $M = -18.5$  mag. We show  
264 the lightcurve and *r*-band cutouts for this transient in Supplementary Information Figure 4. The  
265 last non-detection in this field was 3 hours before the LVC alert.

266 *ZTF20aafksha* - This last non-detection for this transient was 1.2 days before the GW alert.  
267 We discovered this candidate nine days after the merger, offset by  $7.92''$  from a possible spiral  
268 galaxy host at  $z(s) = 0.167$  at  $g = 20.06$  mag<sup>25</sup>, corresponding to an absolute magnitude of about  
269  $-19.6$  mag. The steadily declining lightcurve post-peak in both *g*-band and *r*-band,  $0.7$  mag in  
270 *g*-band during the first 19 days, and the bright absolute magnitude, suggests that the candidate is a  
271 SN Ia. We display this candidate in Supplementary Information Figure 4.

272 *ZTF20aagjemb* - First detected 3 days after merger, this nuclear candidate rose by one  
273 magnitude over the course of 5 days in *g*-band<sup>25</sup>. After tracking its evolution over 20 days time, the  
274 lightcurve seems to exhibit a SN-like rise and decline. It presents a slowly-evolving lightcurve,  
275 only fading  $0.1$  mag in the *r*-band during the twenty days. This candidate is also displayed in  
276 Supplementary Information Figure 4. The transient is located in a host with a  $z(p) = 0.21 \pm 0.06$ ,  
277 separated by 6 kpc, implying an absolute magnitude  $M = -19.24$  mag. The last non-detection in  
278 this region was 3 hours before the LVC alert.

279 *ZTF20aafefxe* - This candidate's two detections in *r*-band suggest fading behaviour, but  
280 subsequently the source has not been detected by the nominal survey observations<sup>25</sup>. The last  
281 non-detection in this region was 5 hours before the LVC alert. The first detection was 9 days after  
282 the merger, and there may be a faint host separated by 41 kpc from the transient with  $z(p) = 0.09$   
283  $\pm 0.05$ , indicating a luminosity of  $M = -17.2$  mag. Forced photometry revealed that it had only

284 evolved 0.16 mags in 11 days in the  $g$ -band, placing it clearly into the category of slow evolvers.

285 *ZTF20aafaoki* - The last non-detection in this region was 12 hours before the LVC alert.  
286 This candidate had two  $r$ -band detections at 19.2 mag, but had faded below 21.4 mag just 5 days  
287 later <sup>25</sup>. Our images taken with KPED do not show any transient or background source up to  
288  $g > 19.55$  mag 6 days after the discovery. Similarly, our LCO follow-up observations showed  
289 that 8 days after the discovery, the transient is not detected and there is no visible source at the  
290 corresponding coordinate up to  $g > 20.25$  mag and  $r > 21.6$  mag. Our last LCO observations,  
291 obtained 72 days after the discovery, show no transient up to  $g > 22.10$  mag. However, after  
292 running forced photometry at the transient position, we find a detection 14 days after the initial  
293 discovery at  $r = 21.2$  mag, implying re-brightening of the transient after the non-detection upper  
294 limits, or very slow evolution.

## 295 **Stellar**

296 *ZTF20aafexle* - This particular region was observed serendipitously 1 hour before the LVC alert.  
297 After its initial detection 8 days after the merger, it brightened by nearly one magnitude over four  
298 days but returned to its original brightness after 5 days <sup>25</sup>. We posit that it may be stellar due to  
299 the PS1 detections at the source position. Additionally, its evolution over the first 10 days after the  
300 discovery is only 0.3 mag in the  $r$ -band.

## 301 **Slow-moving asteroids**

302 *ZTF20aaegqfp* - We detected this hostless candidate a day after the merger in  $r$  band. The last  
303 non-detection of this transient was 5 hours before the GW alert. Our pipelines identified it as a  
304 fast-evolving transient due to its rise by more than 0.5 mag over the course of the night; subsequently,  
305 it was not detected in any our serendipitous observations. We find non-physical upper limits  
306 interspersed with detections, suggesting that the photometry for this transient may not be reliable.  
307 Using the Kowalski infrastructure, we queried for alerts in the vicinity of the transient (around 25'')  
308 and found 13 alerts, the oldest of which was  $\sim 4$  days before the trigger, which showed a moving

309 object across the field alerts (see Supplementary Information Figure 3).

310 **S200115j candidates** In this subsection, we provide brief descriptions of candidates identified  
311 within the skymap of S200115j. Most of our candidates were identified during the serendipitous  
312 coverage of the map. Some of our transients were discovered within ZTF Uniform Depth Survey  
313 (ZUDS; Goldstein et al., in prep) a dedicated survey for catching high-redshift SNe by acquiring  
314 and stacking images to achieve greater depth compared to the nominal survey. Intrinsically faint  
315 transients ( $m_{AB} \sim -16$  mag) discovered in these fields are more likely to be at redshifts consistent  
316 with the distance of this event ( $340 \pm 79$  Mpc).

317 The relevant candidates circulated by the GROWTH collaboration <sup>29</sup> were found on the  
318 first night of observations. Weather issues affected systematic follow-up in the following days;  
319 nevertheless, a later deeper search led to more candidates found to be temporally and spatially  
320 consistent, which we report here. Additionally, candidates from Ref. <sup>30</sup> were cross-matched with  
321 the ZTF database in order to temporally constrain the transients. Only S200115j\_X136 <sup>30</sup> had an  
322 optical counterpart we could identify, ZTF20aafapey, with a flaring AGN <sup>31</sup>.

323 Every candidate that was found in the region of interest is listed in Supplementary Information  
324 Table 3.

### 325 **Spectroscopic Classification**

326 *ZTF20aafqpum* - This transient is located at the edge of a host galaxy at  $photz = 0.12 \pm 0.03$  <sup>29</sup>.  
327 The region was last observed 1 hour before the LVC trigger and the transient. Follow-up with the  
328 Liverpool telescope in *r*- and *i*-bands showed this candidate to be red, with  $g - r \sim 0.5$  mag. This  
329 transient was then spectroscopically classified by ePESSTO+ as a SN Ia 91-bg, at  $z(s) = 0.09$  <sup>32</sup>,  
330 placing it at an absolute magnitude of  $M = -17.3$  mag.

331 **(Slow) Photometric Evolution**

332 *ZTF20aahenrt* - This candidate, detected during our serendipitous search 3 days after the merger,  
333 is separated from a galaxy host by 8.8 kpc at  $z(p) = 0.16 \pm 0.04$ , giving it an absolute magnitude  
334 of  $M = -15.6$  mag. We monitored the transient after its initial rise in  $g$ -band, but over 12 days the  
335 candidate lightcurve exhibits very flat evolution, rising by 0.14 mag in 7 days. We highlight it in  
336 Supplementary Information Figure 4 as an example of a very slowly evolving transient identified  
337 in our searches. This field was serendipitously observed 30 min before the LVC alert.

338 *ZTF20aagjqxg* - We selected this hostless candidate during our scanning due to its faint  
339  $g$ -band detection at  $g = 20.65$  mag and subsequent rise three days after the initial detection two  
340 hours after the merger; its detection 11 days later in the  $r$ -band suggests that it was rising or  
341 reddening at a rate of  $< 0.1$  mag/day. This field was last observed 3.5 days before the LVC alert.

342 *ZTF20aahakkp* - This hostless transient was first detected eight days after the merger in  $g$   
343 = 15.67 mag and  $r = 16.01$  mag. The last non- detection of this transient was 20 hours before the  
344 issue of the LVC alert. While the transient seems to be rapidly fading over the course of a day from  
345  $r = 16.26$  mag to  $r = 17.9$  mag, this detection is likely affected by poor weather and bad seeing  
346 on that day (seeing 4"). 20 days later, the lightcurve is near the original detection magnitude, and  
347 exhibits a slow fade since then.

348 *ZTF20aafqulk* - This region was last observed 1 hour before the issue of the GW alert. This  
349 source was detected 2.5 hours after the merger in  $g$ -band and 43 minutes later in  $r$ -band, with a blue  
350 color ( $g-r = 0.2$  mag). The candidate is offset by 0.3" from a potential host galaxy at a photometric  
351 redshift of  $z(p) = 0.27 \pm 0.04$ <sup>29</sup>. Our P60+SEDM spectrum does not offer a clear classification, but  
352 we detect a source in our LCO images 5 days after its discovery with  $r = 20.16 \pm 0.1$  mag. When  
353 running forced photometry, we find a detection in the  $r$ -band 89 days before the trigger, definitively  
354 ruling out its association with the GW event. Furthermore, the lightcurve appears nearly flat in the  
355  $r$ -band over the course of 10 days.

### 356 **Slow-moving asteroids**

357 Solar System asteroids located in the proximity of the stationary points located at  $\sim 60^\circ$  from  
358 opposition and low ecliptic latitude<sup>33</sup> have slow,  $\lesssim 1''/\text{h}$  sky motions<sup>34</sup>.

359 *ZTF20aafqvyc* - This was first detected as a hostless candidate 2.5 hours after the merger  
360 in  $g$ -band, followed by a detection in  $r$ -band just 49 minutes later<sup>29</sup>. Due to the transient being  
361 faint at  $g = 20.39$  mag, with a  $g - r$  color of 0.34 mag, we pursued follow-up with P200+WIRC  
362 on 2020-01-18 with NIR non-detections down to  $J > 21.5$  mag and  $K_s > 20.9$  mag<sup>35</sup> and  
363 LCO on 2020-01-19 with optical non-detections down to  $g > 22.6$  mag,  $r > 21.8$  mag and  $i >$   
364  $20.9$  mag<sup>36</sup>. Follow-up reported with AZT-33IK telescope of Sayan observatory (Mondy) revealed  
365 non-detections just 13 hours and one day after the merger, down to upper limits of 21.6 mag and  
366 22.1 mag in the  $r$ -band, suggesting that the source could be fast-fading, if astrophysical<sup>37</sup>. Finally,  
367 we conducted follow-up with Gemini GMOS-N, detecting no source down to an upper limit of  $g >$   
368  $24.5$  mag<sup>38</sup>. Based on the puzzling non-detections, we investigated the possibilities that it could be  
369 an artifact or that it was a moving object. Close inspection of the images taken with the Liverpool  
370 Telescope, 12.9 hours after the merger in  $g$ - and  $r$ -bands clearly demonstrated that the object had  
371 shifted position in the image with a slow angular rate of motion consistent with being an asteroid  
372 with an opposition-centric location of  $\pm 60^\circ$  near the evening sky stationary point.

### 373 **3 Ejecta mass and binary parameter constraints – Implications and caveats**

374 To further illustrate what we could learn from sufficiently deep observations, we consider potential  
375 constraints on the parameters of the NSBH binary powering S200105ae. We assume that the  
376 source was located at 283 Mpc, and seen face-on. For the deepest fields reported here, we have  
377 seen that this implies  $M_{\text{ej,dyn}} \lesssim 0.02 M_\odot$  and  $M_{\text{ej,pm}} \lesssim 0.04 M_\odot$ . Using semi-analytical formulae  
378 calibrated to the results of numerical simulations, we can estimate  $M_{\text{ej,dyn}}$  and  $M_{\text{ej,pm}}$  as functions  
379 of the mass ratio of the binary ( $Q = M_{\text{BH}}/M_{\text{NS}}$ ), the component of the dimensionless black hole  
380 spin aligned with the orbital angular momentum ( $\chi$ ), and the neutron star compactness ( $C_{\text{NS}} =$   
381  $\frac{GM_{\text{NS}}}{R_{\text{NS}}c^2}$ ) (see also Refs. <sup>39-44</sup>). We compute  $M_{\text{ej,pm}}$  using Ref. <sup>45</sup>, and  $M_{\text{rem}}$  using Ref. <sup>46</sup>, which  
382 are based on, respectively, the work of Ref. <sup>47</sup> and Ref. <sup>48</sup>. As Ref. <sup>45</sup> only predicts the total mass  
383 remaining outside of the BH after merger,  $M_{\text{rem}}$ , we estimate  $M_{\text{ej,pm}} = f_{\text{rem}}(M_{\text{rem}} - M_{\text{ej,dyn}})$ , with



384  $f_{\text{rem}} \sim 0.15 - 0.5$  the fraction of the remnant accretion disk that is ejected in the form of disk  
 385 winds <sup>49</sup>. The results are shown in Extended Data Figure 7, expressed as the maximum BH spin  
 386 compatible with the assumed mass constraints. We show results for  $f_{\text{rem}} = 0.15$  and  $f_{\text{rem}} = 0.5$ ,  
 387 to illustrate the dependence on the (poorly constrained) parameters. While our plots show results  
 388 at a fixed  $M_{\text{NS}} = 1.35 M_{\odot}$ , they can easily be rescaled to any other choice for the neutron star  
 389 mass, as the mass predictions only depend on the ratio  $M_{\text{NS}}/R_{\text{NS}}$ . We note that at high mass  
 390 ratios, the choice of  $f_{\text{rem}}$  has nearly no impact on the constraints. This occurs because the limit  
 391 on  $M_{\text{ej,dyn}}$  is more constraining than the limit on  $M_{\text{ej,pm}}$ . At lower mass ratios, on the other hand,  
 392  $M_{\text{ej,dyn}}$  rapidly decreases (it asymptotes to the low values predicted for BNS systems in the near  
 393 equal-mass regime). In that regime, the choice of  $f_{\text{rem}}$  clearly impacts the constraints that we can  
 394 place on the binary parameters. Conservative upper limits on the BH spin are obtained by choosing  
 395  $f_{\text{rem}} \sim 0.15$ . Should more detailed study of post-merger remnants reveal that higher values of  $f_{\text{rem}}$   
 396 are more realistic, our constraints could become noticeably stronger.

397 We conclude by mentioning three caveats of this analysis. First, as noted above, KN models  
 398 adopted here assume axial symmetry and a distribution over a  $2\pi$  azimuthal angle for the dynamical  
 399 ejecta. In reality, the dynamical ejecta are predicted to cover only  $\sim$  half of the plane and thus  $\sim$   
 400 half of the orientations in the equatorial plane are expected to be brighter than predicted here.  
 401 Accounting for the predicted break of symmetry will therefore produce stronger constraints for  
 402 equatorial viewing angles than those derived here. The second caveat follows from the fact that the  
 403 composition of the post-merger ejecta in NSBH mergers is uncertain. This is due in large part to  
 404 the very approximate treatment of neutrinos used in many simulations <sup>50,51</sup>, but also to the fact that  
 405 the post-merger ejecta may contain a number of independent components with different geometry,  
 406 composition, and temperature <sup>52-54</sup>, and the relative contribution of these various components is  
 407 strongly affected by the unknown strength and large scale structure of the post-merger magnetic  
 408 field <sup>49</sup>. Here we adopted a composition intermediate between lanthanide-poor and lanthanide-rich  
 409 material but note that a different composition would lead to different constraints in the  $M_{\text{ej,dyn}} -$   
 410  $M_{\text{ej,pm}}$  parameter space. For instance, a lanthanide-poor composition for the post-merger ejecta is  
 411 expected to lead to brighter KNe and thus to result in stronger constraints. Finally, a third caveat  
 412 is that binaries leading to extremely massive ejecta are not rigorously excluded by our analysis.  
 413 This is due to the fact that within the grid of models considered here, the more massive ejecta  
 414 ( $M_{\text{dyn}} \gtrsim 0.07 M_{\odot}$  and  $M_{\text{pm}} \gtrsim 0.07 M_{\odot}$ ) lead to KN that evolve too slowly to pass the observational  
 415 cuts that we impose on the time evolution of the magnitude of KN, and also because some extreme

416 low-mass systems may have  $M_{\text{pm}} \geq 0.1M_{\odot}$ , a region not covered by our grid of simulations.  
417 The small regions of parameter space untested by this study is shown in Extended Data Figure 9.  
418 We note that on this figure, the excluded region at high NS radii is due to the observational cuts;  
419 requiring observations to be sensitive to that region of parameter space may lead to many more  
420 false positives. The smaller region at low NS radii and low mass ratio is due to our  $M_{\text{pm}} < 0.1M_{\odot}$   
421 limit.

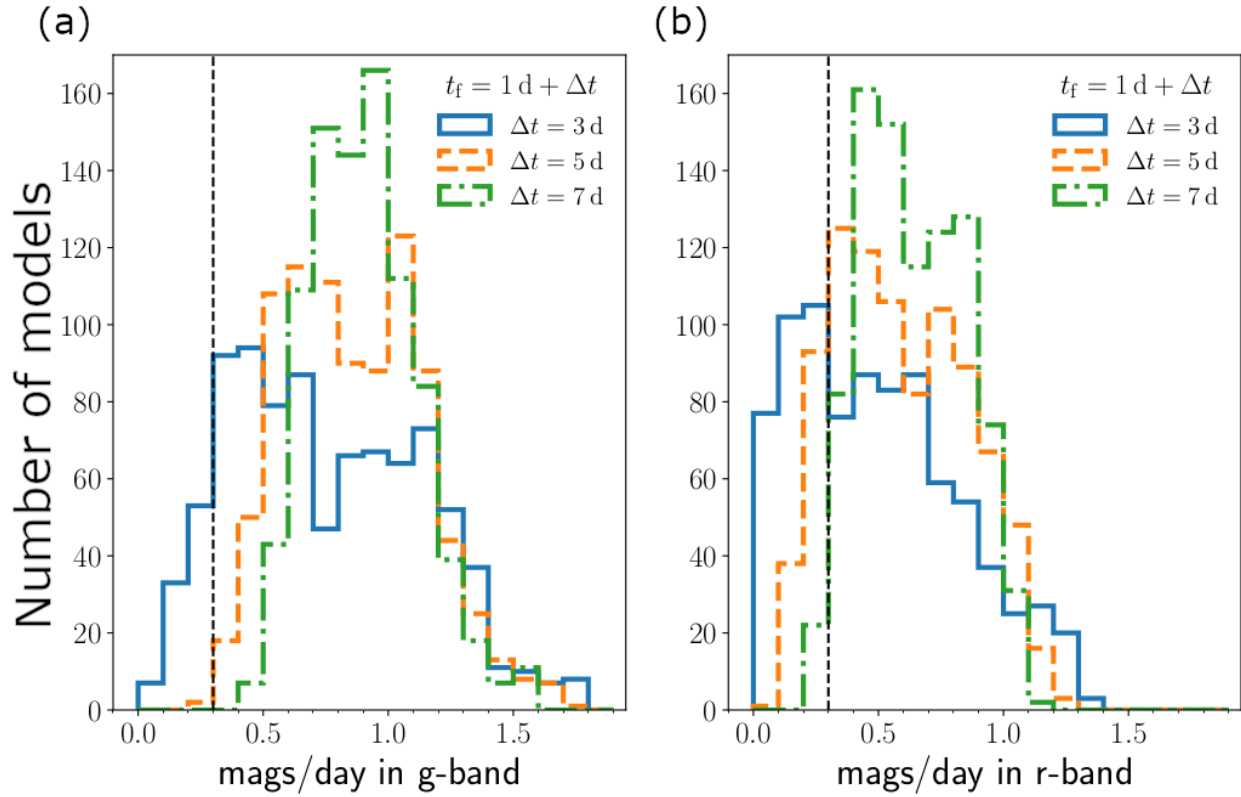

Supplementary Information Figure 2: **Plot of the decay rate (mag/day) in  $g$ -band (a) and  $r$ -band (b) for all the ejecta masses and viewing angles of the modeled grid.** Blue histograms are for time windows from 1 to 4 days after merger ( $\Delta t = 3$  days), orange from 1 to 6 days ( $\Delta t = 5$  days), green from 1 to 8 days ( $\Delta t = 7$  days). In general, 96% of models show faster decay than 0.3 mags/day (dashed vertical line) in  $g$ -band, while 82% of models show faster decay than 0.3 mags/day in  $r$ -band. The more slowly fading models are the higher mass ones. Particularly, our threshold was chosen based on the 7 days baseline, as all the candidates meet that requirement.

(a) 1.05 days before the merger

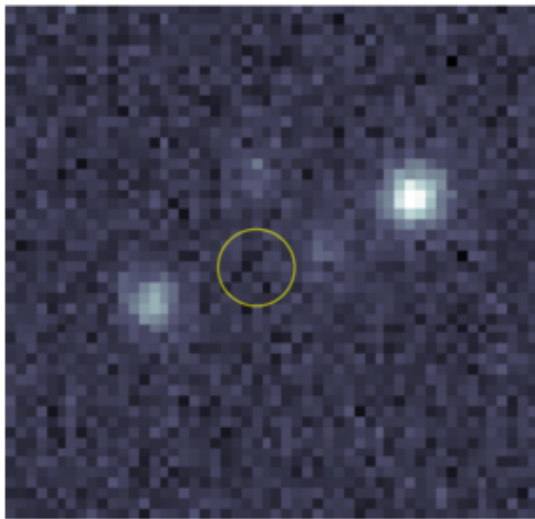

(b) ZTF20aaegqfp

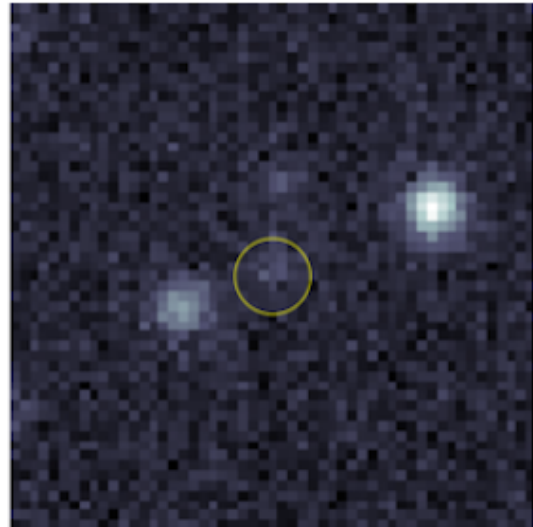

Supplementary Information Figure 3: **ZTF *r*-band cutouts of the slow moving asteroid ZTF20aaegqfp.** The yellow circles show the position of the ZTF candidate in both cutouts. Panel (a) shows a cutout of the region one day before the trigger. There, it is possible to see a source to the right of ZTF20aaegqfp position, marked with a yellow circle. This source was located at  $7.3''$  from our candidate. Panel (b) shows the discovery image of our candidate ZTF20aaegqfp, which is located within the circle. The cutouts are  $0.7 \text{ sq. arcmin}$  and north and east are up and to the left respectively.

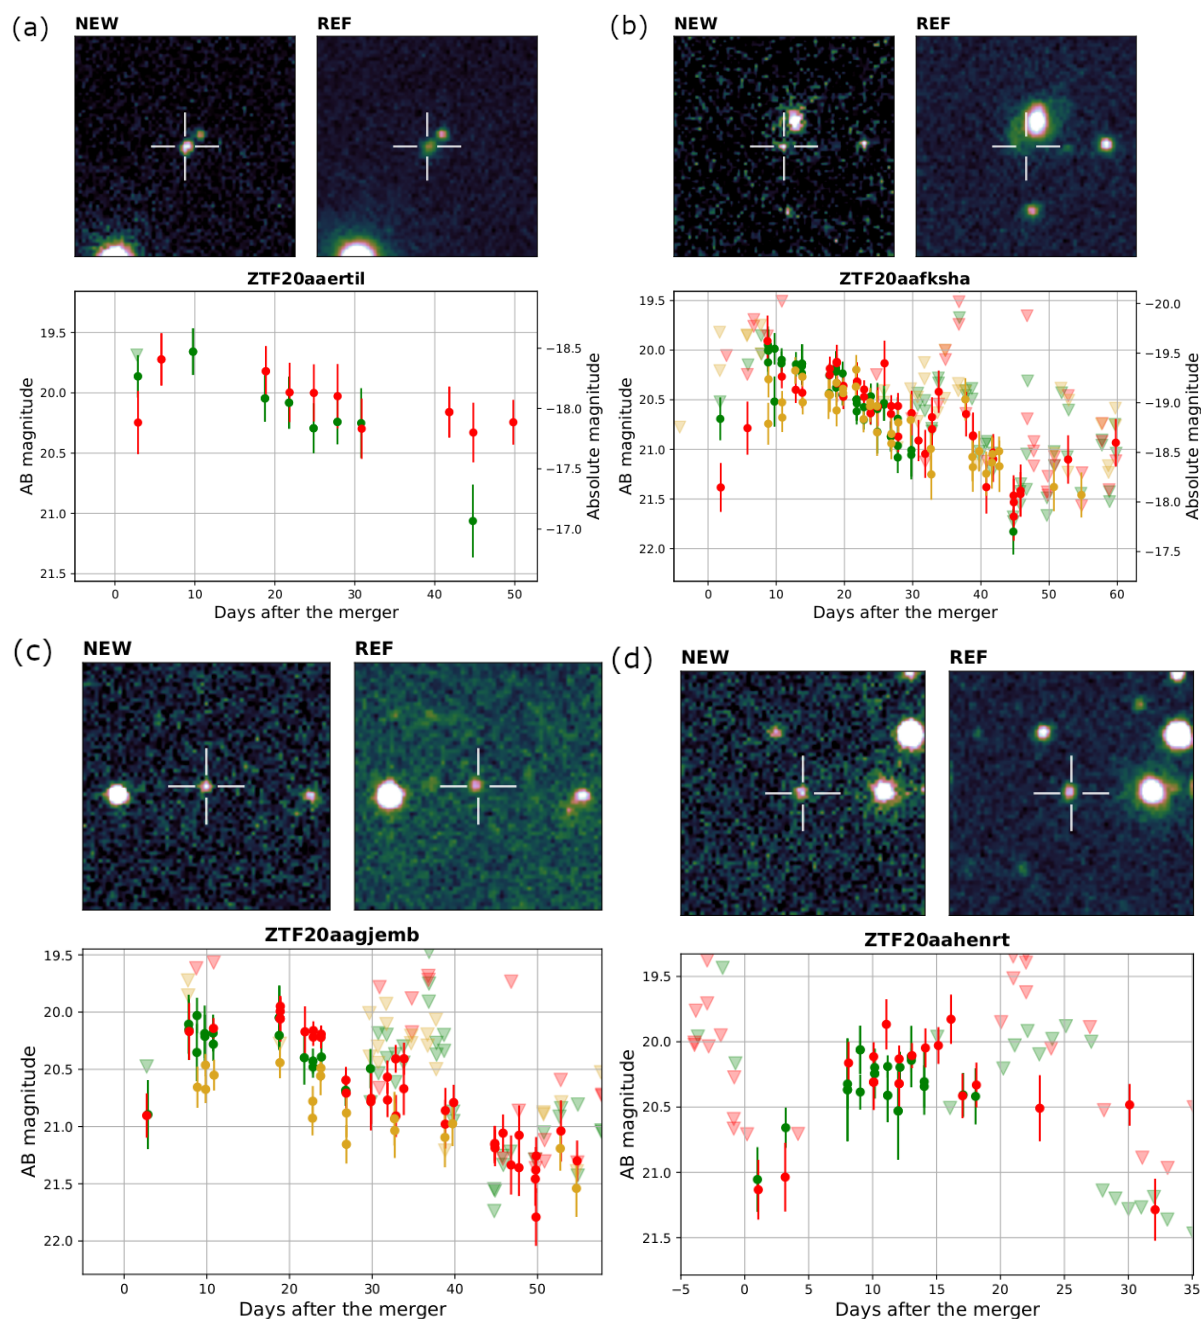

Supplementary Information Figure 4: **Lightcurves and  $r$ -band cutouts for a subset of the most well-sampled lightcurves for ZTF candidates that were ruled out photometrically.** Colors were used to represent the different bands: green, red and yellow for  $g$ -,  $r$ - and  $i$ - bands. The triangles in the lightcurve represent upper limits and filled circles are the detected magnitudes of the object. On each panel, the left cutout is the ZTF discovery image and the right one is the corresponding ZTF reference image. The transient is marked with a cross and the size of the cutouts is 0.7 sq. arcmin with north being up and east to the left. The candidates highlighted here are as follows: (a) ZTF20aaertil, (b) ZTF20aafksha, (c) ZTF20aagjemb, and (d) ZTF20aahernt.

Supplementary Information Table 1: Follow-up table for all spectroscopically classified transients. Our spectra were obtained with GTC <sup>27,28</sup>, ePESSTO <sup>32</sup>, P60+SEDM, and P200+DBSP. The spectroscopic redshifts are listed as well. The objects with a star (\*) were first reported to TNS by ALeRCE. Discovery magnitudes reported are extinction-corrected.

| Name         | RA       | Dec      | TNS       | Discov. Mag.         | Classification | Spec. facilities | Spec. Redshift |
|--------------|----------|----------|-----------|----------------------|----------------|------------------|----------------|
| ZTF20aaertpj | 14:27:52 | 33:34:10 | AT2020pv* | $g = 19.88 \pm 0.16$ | SN Ib          | GTC              | 0.026          |
| ZTF20aaervo  | 15:02:38 | 16:28:22 | AT2020pp* | $g = 20.63 \pm 0.30$ | SN Iip         | GTC              | 0.046          |
| ZTF20aaervyn | 15:01:27 | 20:37:24 | AT2020pq* | $g = 20.62 \pm 0.26$ | SN Ia          | GTC              | 0.112          |
| ZTF20aaerxsd | 14:00:54 | 45:28:22 | AT2020py  | $g = 20.27 \pm 0.23$ | SN Ia          | GTC              | 0.055          |
| ZTF20aaerqbx | 15:49:26 | 40:49:55 | AT2020ps* | $g = 19.46 \pm 0.15$ | SN Iip         | GTC              | 0.098          |
| ZTF20aafanxk | 05:35:36 | 11:46:15 | AT2020adk | $r = 18.52 \pm 0.25$ | SN Ia          | P60+SEDM         | 0.133          |
| ZTF20aafujqk | 17:57:00 | 10:32:20 | AT2020adg | $r = 18.17 \pm 0.10$ | SN Ia          | P60+SEDM         | 0.074          |
| ZTF20aaevbzl | 13:26:41 | 30:52:31 | AT2020adf | $i = 19.31 \pm 0.24$ | CV             | P200+DBSP        | 0.0            |
| ZTF20aafqpum | 03:06:08 | 13:54:48 | SN2020yo  | $g = 19.76 \pm 0.20$ | SN Ia 91-bg    | ePESSTO          | 0.09           |

## 422 References

- 423 1. Bellm, E. C. *et al.* The zwicky transient facility: System overview, performance, and first  
424 results. *Pub. Astron. Soc. Pac.* **131**, 018002 (2018). URL [https://doi.org/10.1088%](https://doi.org/10.1088%2F1538-3873%2Faaecbe)  
425 [2F1538-3873%2Faaecbe](https://doi.org/10.1088%2F1538-3873%2Faaecbe).
- 426 2. Masci, F. J. *et al.* The zwicky transient facility: Data processing, products, and archive. *Pub.*  
427 *Astron. Soc. Pac.* **131**, 018003 (2018).
- 428 3. Yao, Y. *et al.* ZTF early observations of type ia supernovae. i. properties of the 2018 sample.  
429 *Astrophys. J.* **886**, 152 (2019). URL [http://dx.doi.org/10.3847/1538-4357/](http://dx.doi.org/10.3847/1538-4357/ab4cf5)  
430 [ab4cf5](http://dx.doi.org/10.3847/1538-4357/ab4cf5).
- 431 4. Almualla, M. *et al.* Dynamic scheduling: target of opportunity observations of gravitational  
432 wave events. *Mon. Not. R. Astron. Soc.* **495**, 4366–4371 (2020). URL [https://](https://doi.org/10.1093/mnras/staa1498)  
433 [doi.org/10.1093/mnras/staa1498](https://doi.org/10.1093/mnras/staa1498). [https://academic.oup.com/mnras/](https://academic.oup.com/mnras/article-pdf/495/4/4366/33371783/staa1498.pdf)  
434 [article-pdf/495/4/4366/33371783/staa1498.pdf](https://academic.oup.com/mnras/article-pdf/495/4/4366/33371783/staa1498.pdf).
- 435 5. Rana, J., Anand, S. & Bose, S. Optimal search strategy for finding transients in large-sky error  
436 regions under realistic constraints. *Astrophys. J.* **876**, 104 (2019). URL [http://dx.doi.](http://dx.doi.org/10.3847/1538-4357/ab165a)  
437 [org/10.3847/1538-4357/ab165a](http://dx.doi.org/10.3847/1538-4357/ab165a).

Supplementary Information Table 2: Follow-up table of the candidates identified for S200105ae, reported in Ref. <sup>25</sup>. The ZTF objects with a star (\*) in the TNS column were first reported to TNS by ALeRCE. The spectroscopic (s) or photometric (p) redshifts of the respective host galaxies are listed as well. As a reference, the all-sky averaged distance to the source is  $283 \pm 74$  Mpc, corresponding to a redshift range  $z = 0.045\text{--}0.077$ . We use the same rejection criteria described in more detail in section 2 here, as follows: slow photometric evolution (slow), hostless, stellar, and slow moving asteroid (asteroid).

| Name         | RA       | Dec       | TNS        | Discov. Mag.         | Host/Redshift         | rejection criteria |
|--------------|----------|-----------|------------|----------------------|-----------------------|--------------------|
| ZTF20aafdvt  | 03:36:29 | −07:49:35 | AT2020ado  | $g = 19.57 \pm 0.29$ | $0.25 \pm 0.02$ (p)   | slow               |
| ZTF20aafndh  | 01:22:38 | −06:49:34 | AT2020xz   | $g = 19.11 \pm 0.11$ | $0.091 \pm 0.023$ (p) | slow               |
| ZTF20aaexpwt | 06:26:01 | 11:33:39  | AT2020adi  | $r = 16.95 \pm 0.17$ | -                     | slow               |
| ZTF20aafukgx | 18:23:21 | 17:49:32  | AT2020adj  | $r = 18.40 \pm 0.15$ | -                     | slow               |
| ZTF20aagijez | 15:04:13 | 27:29:04  | AT2020adm  | $r = 19.67 \pm 0.3$  | 0.061 (s)             | slow               |
| ZTF20aagiiik | 16:19:10 | 53:45:38  | AT2020abl* | $g = 19.76 \pm 0.22$ | 0.13 (s)              | slow               |
| ZTF20aafdxfk | 03:42:07 | −03:11:39 | AT2020ads  | $r = 20.02 \pm 0.25$ | -                     | slow               |
| ZTF20aagiipi | 15:33:25 | 42:02:37  | AT2020adl  | $g = 20.10 \pm 0.32$ | $0.39 \pm 0.02$ (p)   | slow               |
| ZTF20aafsnux | 14:36:01 | 55:11:49  | AT2020dzu  | $g = 19.67 \pm 0.22$ | -                     | slow               |
| ZTF20aaertil | 14:52:26 | 31:01:19  | AT2020pu*  | $g = 19.86 \pm 0.18$ | 0.093 (s)             | slow               |
| ZTF20aafksha | 13:43:54 | 38:25:14  | AT2020adr  | $g = 20.06 \pm 0.26$ | 0.167 (s)             | slow               |
| ZTF20aagjemb | 14:51:26 | 45:20:41  | AT2020adh  | $r = 20.90 \pm 0.02$ | $0.21 \pm 0.06$ (p)   | slow               |
| ZTF20aafefxe | 07:47:24 | 14:42:24  | AT2020adt  | $g = 21.0 \pm 0.18$  | $0.09 \pm 0.05$ (p)   | slow               |
| ZTF20aafaoki | 05:13:14 | 05:09:56  | AT2020adq  | $r = 19.21 \pm 0.28$ | -                     | slow               |
| ZTF20aafexle | 04:20:31 | −09:30:28 | AT2020adn  | $r = 19.67 \pm 0.30$ | $0.18 \pm 0.02$ (p)   | stellar            |
| ZTF20aaegqfp | 07:49:02 | 12:29:26  | AT2020dzt  | $r = 19.37 \pm 0.27$ | -                     | asteroid           |

Supplementary Information Table 3: Follow-up table of the candidates identified for S200115j, reported in Ref. <sup>29</sup>. As a reference, the all-sky averaged distance to the source is  $340 \pm 79$  Mpc, corresponding to a redshift range  $z = 0.056\text{--}0.089$ .

| Name         | RA       | Dec      | TNS       | Discov. Mag.         | Host/Redshift       | rejection criteria |
|--------------|----------|----------|-----------|----------------------|---------------------|--------------------|
| ZTF20aahenrt | 09:32:53 | 72:23:06 | AT2020axb | $g = 20.55 \pm 0.29$ | $0.16 \pm 0.04$ (p) | slow               |
| ZTF20aagjqxg | 02:59:39 | 06:41:11 | AT2020aao | $g = 20.65 \pm 0.26$ | -                   | slow               |
| ZTF20aahakkp | 05:07:55 | 56:27:50 | AT2020bbk | $g = 15.67 \pm 0.08$ | -                   | slow               |
| ZTF20aafqulk | 03:39:45 | 27:44:05 | AT2020yp  | $g = 20.74 \pm 0.21$ | -                   | stellar            |
| ZTF20aafqvyc | 03:47:58 | 38:26:32 | AT2020yq  | $r = 20.39 \pm 0.19$ | -                   | asteroid           |

- 438 6. Hook, I. *et al.* The gemini–north multi-object spectrograph: Performance in imaging, long-slit,  
439 and multi-object spectroscopic modes. *Pub. Astron. Soc. Pac.* **116**, 425–440 (2004).
- 440 7. Blagorodnova, N. *et al.* The SED Machine: A Robotic Spectrograph for Fast Transient  
441 Classification. *Pub. Astron. Soc. Pac.* **130**, 035003 (2018).
- 442 8. Wilson, J. C. *et al.* *A Wide-Field Infrared Camera for the Palomar 200-inch Telescope*,  
443 vol. 4841 of *Society of Photo-Optical Instrumentation Engineers Conference Series*, 451–458  
444 (2003).
- 445 9. Coughlin, M. W. *et al.* The Kitt Peak Electron Multiplying CCD demonstrator. *Mon.*  
446 *Not. R. Astron. Soc.* **485**, 1412–1419 (2019). URL [https://doi.org/10.1093/](https://doi.org/10.1093/mnras/stz497)  
447 [http://oup.prod.sis.lan/mnras/article-pdf/485/1/](http://oup.prod.sis.lan/mnras/article-pdf/485/1/1412/27994954/stz497.pdf)  
448 [1412/27994954/stz497.pdf](http://oup.prod.sis.lan/mnras/article-pdf/485/1/1412/27994954/stz497.pdf).
- 449 10. Bertin, E. & Arnouts, S. SExtractor: Software for source extraction. *Astron. Astrophys.* **117**,  
450 393–404 (1996).
- 451 11. Chambers, K. C. *et al.* The Pan-STARRS1 Surveys. *arXiv e-prints* arXiv:1612.05560 (2016).  
452 1612.05560.
- 453 12. Bertin, E. *Automatic Astrometric and Photometric Calibration with SCAMP*, vol. 351 of  
454 *Astron. Soc. Pac. Conf. Ser.*, 112–115 (2006).
- 455 13. Becker, A. Hotpants: High order transform of psf and template subtraction. *Astrophysics*  
456 *Source Code Library* (2015).
- 457 14. Alard, C. Image subtraction using a space-varying kernel. *Astron. Astrophys.* **144**, 363–370  
458 (2000).
- 459 15. Steele, I. A. *et al.* The liverpool telescope: performance and first results **5489**, 679–692 (2004).
- 460 16. Fremling, C. *et al.* PTF12os and iPTF13bvn. Two stripped-envelope supernovae from  
461 low-mass progenitors in NGC 5806. *Astron. Astrophys.* **593**, A68 (2016).
- 462 17. De, K. *et al.* Palomar Gattini-IR: Survey Overview, Data Processing System, On-sky  
463 Performance and First Results. *Pub. Astron. Soc. Pac.* **132**, 025001 (2020).



- 464 18. Bertin, E. *et al.* The TERAPIX Pipeline. In Bohlender, D. A., Durand, D. & Handley, T. H.  
465 (eds.) *Astronomical Data Analysis Software and Systems XI*, vol. 281 of *Astronom. Soc. Pac.*  
466 *Conf. Ser.*, 228 (2002).
- 467 19. Skrutskie, M. F. *et al.* The Two Micron All Sky Survey (2MASS). *Astrophys. J.* **131**,  
468 1163–1183 (2006).
- 469 20. Schlafly, E. F. & Finkbeiner, D. P. Measuring reddening with sloan digital sky survey stellar  
470 spectra and recalibrating sfd. *Astrophys. J.* **737**, 103 (2011).
- 471 21. Rigault, M. *et al.* Fully automated integral field spectrograph pipeline for the sedmachine:  
472 pypedm. *Astron. Astrophys.* **627**, A115 (2019). URL [http://dx.doi.org/10.1051/  
473 0004-6361/201935344](http://dx.doi.org/10.1051/0004-6361/201935344).
- 474 22. Blondin, S. & Tonry, J. L. Determining the type, redshift, and age of a supernova spectrum.  
475 *Astrophys. J.* **666**, 1024–1047 (2007). URL <http://dx.doi.org/10.1086/520494>.
- 476 23. Bellm, E. C. & Sesar, B. pyraf-dbsp: Reduction pipeline for the Palomar Double Beam  
477 Spectrograph (2016). 1602.002.
- 478 24. Stein, R. *et al.* LIGO/Virgo S200105ae: Candidates from the Zwicky Transient Facility. *GRB*  
479 *Coordinates Network* **26673**, 1 (2020).
- 480 25. Ahumada, T. *et al.* LIGO/Virgo S200105ae: More candidates from the Zwicky Transient  
481 Facility. *GRB Coordinates Network* **26810**, 1 (2020).
- 482 26. Dey, A. *et al.* Overview of the desi legacy imaging surveys. *Astron. J.* **157**, 168 (2019). URL  
483 <http://dx.doi.org/10.3847/1538-3881/ab089d>.
- 484 27. Castro-Tirado, A. J. *et al.* LIGO/Virgo S200105ae: AT2020pq, AT2020ps and AT2020pv  
485 10.4m GTC spectroscopy. *GRB Coordinates Network* **26703** (2020).
- 486 28. Valeev, A. F. *et al.* LIGO/Virgo S200105ae: AT2020pp and AT2020py 10.4m GTC  
487 spectroscopy. *GRB Coordinates Network* **26702** (2020).
- 488 29. Anand, S. *et al.* LIGO/Virgo S200115j: Candidates from the Zwicky Transient Facility. *GRB*  
489 *Coordinates Network* **26767**, 1 (2020).

- 490 30. Evans, P. A. *et al.* LIGO/Virgo S200115j: Swift-XRT sources. *GRB Coordinates Network*  
491 **26798**, 1 (2020).
- 492 31. Andreoni, I., Kasliwal, M. M., Cenko, S. B. & Yao, Y. LIGO/Virgo S200115j: Zwicky  
493 Transient Facility search for optical counterparts to Swift X-ray sources. *GRB Coordinates*  
494 *Network* **26863**, 1 (2020).
- 495 32. Schulze, S., Irani, I., Zimmerman, E., Bruch, R. & Yaron, O. ePESSTO+ Transient  
496 Classification Report for 2020-01-16. *Transient Name Server Classification Report* **2020-160**,  
497 1 (2020).
- 498 33. Green, R. M. *Spherical Astronomy* (1985).
- 499 34. Jedicke, R., Bolin, B., Granvik, M. & Beshore, E. A fast method for quantifying observational  
500 selection effects in asteroid surveys. *Icarus* **266**, 173–188 (2016).
- 501 35. De, K., Hankins, M. & Kasliwal, M. M. LIGO/Virgo S200115j: NIR upper limits for  
502 ZTF20aafqvyc/AT2020yq from the Palomar 200-inch telescope. *GRB Coordinates Network*  
503 **26814**, 1 (2020).
- 504 36. Ahumada, T., Coughlin, M. & Anand, S. LIGO/Virgo S200115j: LCO upper limits for  
505 ZTF20aafqvyc/AT2020yq from the McDonald Observatory 1-m telescope. *GRB Coordinates*  
506 *Network* **26817**, 1 (2020).
- 507 37. Mazaeva, E., Pozanenko, A., Belkin, S., Klunko, E. & Volnova, A. LIGO/Virgo S200115j:  
508 Mondy upper limits for ZTF20aafqvyc/AT2020yq. *GRB Coordinates Network* **26819**, 1  
509 (2020).
- 510 38. Ahumada, T. & Singer, L. LIGO/Virgo S200115j: GMOS-N upper limits for  
511 ZTF20aafqvyc/AT2020yq from the Gemini Observatory. *GRB Coordinates Network* **26822**, 1  
512 (2020).
- 513 39. Coughlin, M. W. *et al.* Constraints on the neutron star equation of state from  
514 AT2017gfo using radiative transfer simulations. *Mon. Not. R. Astron. Soc.* **480**,  
515 3871–3878 (2018). URL <http://dx.doi.org/10.1093/mnras/sty2174>.  
516 /oup/backfile/content\_public/journal/mnras/480/3/10.1093\_  
517 mnras\_sty2174/1/sty2174.pdf.

- 518 40. Coughlin, M. W., Dietrich, T., Margalit, B. & Metzger, B. D. Multimessenger  
519 Bayesian parameter inference of a binary neutron star merger. *Mon. Not. R. Astron.*  
520 *Soc.: Letters* **489**, L91–L96 (2019). URL [https://doi.org/10.1093/mnrasl/](https://doi.org/10.1093/mnrasl/slz133)  
521 [http://oup.prod.sis.lan/mnrasl/article-pdf/489/1/L91/](http://oup.prod.sis.lan/mnrasl/article-pdf/489/1/L91/30032497/slz133.pdf)  
522 [30032497/slz133.pdf](http://oup.prod.sis.lan/mnrasl/article-pdf/489/1/L91/30032497/slz133.pdf).
- 523 41. Coughlin, M. W. *et al.* Implications of the search for optical counterparts during the first six  
524 months of the Advanced LIGO’s and Advanced Virgo’s third observing run: possible limits  
525 on the ejecta mass and binary properties. *Mon. Not. R. Astron. Soc.* **492**, 863–876 (2019).  
526 URL <https://doi.org/10.1093/mnras/stz3457>. [https://academic.](https://academic.oup.com/mnras/article-pdf/492/1/863/31760484/stz3457.pdf)  
527 [oup.com/mnras/article-pdf/492/1/863/31760484/stz3457.pdf](https://academic.oup.com/mnras/article-pdf/492/1/863/31760484/stz3457.pdf).
- 528 42. Andreoni, I. *et al.* GROWTH on S190814bv: Deep Synoptic Limits on the  
529 Optical/Near-infrared Counterpart to a Neutron StarBlack Hole Merger. *Astrophys. J.* **890**,  
530 131 (2020).
- 531 43. Dietrich, T. *et al.* New constraints on the supranuclear equation of state and the hubble constant  
532 from nuclear physics – multi-messenger astronomy (2020). 2002.11355.
- 533 44. Coughlin, M. W. *et al.* Implications of the search for optical counterparts during the second  
534 part of the advanced ligo’s and advanced virgo’s third observing run: lessons learned for future  
535 follow-up observations (2020). 2006.14756.
- 536 45. Foucart, F., Hinderer, T. & Nisanke, S. Remnant baryon mass in neutron star-black hole  
537 mergers: Predictions for binary neutron star mimickers and rapidly spinning black holes. *Phys.*  
538 *Rev.* **D98**, 081501 (2018).
- 539 46. Krüger, C. J. & Foucart, F. Estimates for disk and ejecta masses produced in compact binary  
540 mergers. *Physical Review D* **101**, 103002 (2020). URL [http://dx.doi.org/10.1103/](http://dx.doi.org/10.1103/PhysRevD.101.103002)  
541 [PhysRevD.101.103002](http://dx.doi.org/10.1103/PhysRevD.101.103002).
- 542 47. Foucart, F. Black-hole-neutron-star mergers: Disk mass predictions. *Phys. Rev. D* **86**, 124007  
543 (2012).
- 544 48. Kawaguchi, K., Kyutoku, K., Shibata, M. & Tanaka, M. Models of Kilonova/macronova  
545 Emission From Black Hole–neutron Star Mergers. *Astrophys. J.* **825**, 52 (2016).

- 546 49. Christie, I. M. *et al.* The Role of Magnetic Field Geometry in the Evolution of Neutron Star  
547 Merger Accretion Discs. *Mon. Not. R. Astron. Soc.* **490**, 4811–4825 (2019).
- 548 50. Wanajo, S. *et al.* Production of all the r-process nuclides in the dynamical ejecta of neutron  
549 star mergers. *Astrophys. J. Lett.* **789**, L39 (2014). URL [http://stacks.iop.org/  
550 2041-8205/789/i=2/a=L39](http://stacks.iop.org/2041-8205/789/i=2/a=L39).
- 551 51. Foucart, F. *et al.* Evaluating radiation transport errors in merger simulations using a Monte  
552 Carlo algorithm. *Phys. Rev.* **D98**, 063007 (2018).
- 553 52. Kiuchi, K. *et al.* High resolution magnetohydrodynamic simulation of black hole-neutron star  
554 merger: Mass ejection and short gamma ray bursts. *Phys. Rev. D* **92**, 064034 (2015). URL  
555 <https://link.aps.org/doi/10.1103/PhysRevD.92.064034>.
- 556 53. Siegel, D. M. & Metzger, B. D. Three-dimensional general-relativistic magnetohydrodynamic  
557 simulations of remnant accretion disks from neutron star mergers: Outflows and r-process  
558 nucleosynthesis. *Phys. Rev. Lett.* **119**, 231102 (2017). URL [http://dx.doi.org/10.  
559 1103/PhysRevLett.119.231102](http://dx.doi.org/10.1103/PhysRevLett.119.231102).
- 560 54. Fernández, R., Tchekhovskoy, A., Quataert, E., Foucart, F. & Kasen, D. Long-term  
561 GRMHD simulations of neutron star merger accretion discs: implications for electromagnetic  
562 counterparts. *Mon. Not. R. Astron. Soc.* **482**, 3373–3393 (2019).
